# Supplementary material for: Production of Large-Ring Cyclodextrins by Amylomaltases
Source: MDPI journal article supplement (doi:10.3390/molecules27041446), 2022-02-21
Supplement: s1 [file s1]

|          |                                                               |    |
|----------|---------------------------------------------------------------|----|
| SaAM     | -----                                                         | 0  |
| TaAM     | -----                                                         | 0  |
| AtDPE1   | -----                                                         | 0  |
| D-enzyme | -----MAIHTCFSLIPSSFS-SPK                                      | 18 |
| EcAM     | MESKR-LDNAALAAGISPNYINAHGKPQSI SAETKRRL-----                  | 38 |
| CgAM     | MTARRFLNELADLYGVATS YTDYKGAHIEVSDDTLVKILRALGVNLDTSNLPNDDAIQRC | 60 |

|          |                                                              |     |
|----------|--------------------------------------------------------------|-----|
| SaAM     | -----                                                        | 0   |
| TaAM     | -----                                                        | 0   |
| AtDPE1   | ---MH---HHHHHGKPIPNPLGLDSTENLY---FQGIDPFTMEVVSS-----         | 39  |
| D-enzyme | LP-YP---KNTTFQSPIP-----KLS-RPTFM---FDRKGSF-----              | 47  |
| EcAM     | --DAMHQRTATKVAVTPVPNVMVYTS GKKM--PMVVEGSGEYSWLLTTE-----      | 83  |
| CgAM     | I ALFH DRE---FTRPLPSSVVAVEGDELVPVHVHDGSPADVHIELEDGTQRDVSQVEN | 116 |

|          |                                                                |     |
|----------|----------------------------------------------------------------|-----|
| SaAM     | -----MAKK                                                      | 4   |
| TaAM     | -----MELP                                                      | 4   |
| AtDPE1   | -----NSTCLSSISVGEDFPSEYEQ-----WLPVPDPESR                       | 69  |
| D-enzyme | -----QNGTAAVPAVGEDFPIDYAD-----WLPKRPDNR                        | 77  |
| EcAM     | --EGTQYKGHVTGGKAFNLP TKLPEGYHTLTLTQDDQRAHCRVIVAPKRC YEPQALLNKQ | 141 |
| CgAM     | WTAPREIDGIRWGEASF KIPGDLPLGWHKHLKSNERSAECGLIITPARLSTADKYLDSP   | 176 |

|          |                                                                |     |
|----------|----------------------------------------------------------------|-----|
| SaAM     | RASGVL MHITSLPG--DLGIGTFGREAYAFVDFLVETDQKFWQILPLTTTS----FGDSP  | 58  |
| TaAM     | RAFGLLLHPTSLPG--PYGVVLGREARDFLRFLKEAGGRYQVLPPLGPTG----YGDSP    | 58  |
| AtDPE1   | RRAGVLLHPTSFRG--PHGIGDLGEEAFRIDWLHSTGCSVWQVLPPLVPPD---EGGSP    | 123 |
| D-enzyme | RRAGILLHPTSFPG--PYGIGDLGPQAFKFLDWLHLAGCSLWQVLPPLVPPGKRG NEDGSP | 135 |
| EcAM     | KLWGACVQLYTLRSEKNWGI GDFGDLKAMLV-DVAKRGGSFIGNPIHALYPANPESASP   | 200 |
| CgAM     | -RSGVMAQIYSVRSTLSWGMGDFNDLGNLAS-VVAQDGADFLINPMHAAEPLPPTEDSP    | 234 |
|          | * : :. . *:* : : : *                                           |     |

|          |                                                              |     |
|----------|--------------------------------------------------------------|-----|
| SaAM     | YQSFSAVAGNTHLIDFDLLTLEGFISKDD-----YQNISFGQDPEVVDYAGLFEKRR    | 110 |
| TaAM     | YQSFSAFAGNPYLIDLRPLAERGYVRLED-----PG----FPQGRVDYGLLYAWKW     | 105 |
| AtDPE1   | YAGQDANCNTLLISLDELVKDGLLIKDE-----LPQ---PIDADSVNYQTANKLKS     | 172 |
| D-enzyme | YSGQDANCNTLLISLEELVDDGLLKMEE-----LPE---PLPTDRVNYSTISEIKD     | 184 |
| EcAM     | YSPSSRRWLVNIYIDVNAVEDFHLSEEQAQWQLPTTQQTQQARDADWDVYSTVTALKM   | 260 |
| CgAM     | YLPTRRFINPIYIRVEDIPEFNQLEIDLRDDIAEMAAEFRENRNLTSDIERNVDVYAAKL | 294 |
|          | * * * . : : :                                                |     |

|          |                                                                  |     |
|----------|------------------------------------------------------------------|-----|
| SaAM     | PVLEKAVKNFLKEERAT--RMLSDF---LQEEKWVTDFAEFMA-----IKEHFNGKALQE     | 160 |
| TaAM     | PALKEAFRGFKEKASPEEREAF AAFRE--REAWWLEDYALFMA-----LKGAGGLPWNR     | 158 |
| AtDPE1   | PLITKAAKRLIDGN-GELKSKLLDFRNDPSISCWLEDAAYFAA-----IDNTLNAYSWE      | 226 |
| D-enzyme | PLITKAAKRLLSSE-GELKDQLENFRDRPNISSWLEDAAYFAA-----IDNSVNTISWYD     | 238 |
| EcAM     | TALRMAWKGF AQRDDEQ-MAAFRQFVAE--QGDSLFWQA AFDALHAQQVKEDEM RWG WPA | 317 |
| CgAM     | QVLRAIFE--MPRSSER-EANFVSFVQR--EGQGLID-----FAT                    | 329 |
|          | : . : * :                                                        |     |

|          |                                                                |     |
|----------|----------------------------------------------------------------|-----|
| SaAM     | WDDKAIIRREEEALAGYRQKLSEVIKYHEVTQYFFYKQWFELKEYANDKG--IQIIGDMP   | 218 |
| TaAM     | WPLP-LRKREEKALREAKSALAE EVA FHAFTQWLFFRQWGALKAEAEALG--IRIIGDMP | 215 |
| AtDPE1   | WPEP-LKNRHLSALEAIYESQKEFIDLFIAKQFLFQRQWQKVREYARRQG--VDIMGDMP   | 283 |
| D-enzyme | WPEP-LKNRHLSALEE VYQSEKDFIDIFIAQQFLFQRQWKKVRDYARSKG--ISIMGDMP  | 295 |
| EcAM     | WPEM-YQNVDSPEVRQFCEEHRDDVDFYWLWLQWLAYSQFAACWEISQGYEMP IGLYRDLA | 376 |
| CgAM     | WCAD-RETAQSES VHGTEPDRDELTMFYMWLQWLCDEQLAA AQRAVDAGMSIGIMADLA  | 388 |
|          | * . : : * : : *                                                |     |

|          |                                                                 |     |
|----------|-----------------------------------------------------------------|-----|
| SaAM     | IYVSADSVEVWTMP ELFKLDRDKQPLAIAGVPADDFSDDGQLWGNPIYNWDYHKESDFDW   | 278 |
| TaAM     | IFVAEDSAE VWAHP EWFHLDEEGRPTV VAGVPPDYFSETGQRWGNPLYRWDVLEREGFSF | 275 |
| AtDPE1   | IYVGYSADVWANKKHFLLNKKGFP LLVSGVPPDLFSETGQLWGSPLYDWKAMESDQYSW    | 343 |
| D-enzyme | IYVGYSADVWANKKQFLNLRKGFP LIVSGVPPDAFSETGQLWGSPLYDWKAMEKDGFSW    | 355 |
| EcAM     | VGVAEGGAETWCDRELYCLK-----ASVGAPPDILGPLGQNWGLPPMDPHIITARAYEP     | 430 |
| CgAM     | VGVHPGGADAQNL SHVLAPD-----ASVGAPPDGYNQQGQDWSQPPWHPVRLAEEGYIP    | 442 |
|          | : * :. : . * * * . * * * :                                      |     |

|          |                          |                          |                               |                              |              |     |
|----------|--------------------------|--------------------------|-------------------------------|------------------------------|--------------|-----|
| SaAM     | WIYRIQSGVKMYDYLRIDHFKGFS | DIWEIRGDYQTANDGSWQPAPGP  | ELFA--TIKEKLG                 | 336                          |              |     |
| TaAM     | WIRRLEKALELFLHLVRIDHFRGF | EAYWEIPASCPTAVEGRWVKAPGE | KLFQ--KIQEVFG                 | 333                          |              |     |
| AtDPE1   | WVNRIIRAQDLYDECRIDHFRGF  | AGFWAVPSEAKVAMVGRWKVGP   | GKSLFD--AISKGVG               | 401                          |              |     |
| D-enzyme | WVRRIQRATDLFDEFRIDHFRGF  | AGFWAVPSEEKIAILGRWKVGP   | GKPLFD--AILQAVG               | 413                          |              |     |
| EcAM     | FIELLRANMQNCALRIDHVM     | SMLRLWWIPIYGE-TADQGAYVHY | PVDDLLSILALESKRH              | 489                          |              |     |
| CgAM     | WRNLLRTVLRHSGGIRVDHVLGL  | RFLRFVMPRMQ-SPATGTYIRFDH | NALVGLALEAELA                 | 501                          |              |     |
|          | :                        | :                        | :*:. : :                      |                              |              |     |
| SaAM     | DLPIIAENLGYIDERAERLLAGT  | GFPGMKIMEFGFYDTTGN       | SIDIPHNYTE--NTIAYAG           | 394                          |              |     |
| TaAM     | EVPVLAEDLGVITPEVEALRDR   | FGLPGMKVLQFAFDDGMEN-P    | FLPHNYPAHGRVVVYTG             | 392                          |              |     |
| AtDPE1   | KIKIIAEDLGVITKDVVELRKS   | IGAPGMAVLQFAFGGADN-P     | HLPHNHEV--NQVVYSG             | 458                          |              |     |
| D-enzyme | KINIIAEDLGVITEDVVQLRKS   | IEAPGMAVLQFAFGSDAEN-P    | HLPHNHEQ--NQVVYTG             | 470                          |              |     |
| EcAM     | RCMVIGEDLGTVPVEIVGKL     | RSSGVYSYKVLYFENDHEKT--   | FRAPKAYPE--QSMAVAA            | 545                          |              |     |
| CgAM     | GAVVIGEDLGTTFEPWVQDALA   | QRGIMGTSILWFEHSPSQPG-    | PRRQEEYRP--LALTTVT            | 558                          |              |     |
|          | ::.*:.*.                 | .                        | :: *                          |                              |              |     |
| SaAM     | THDNEVINGWFENLTVEQKAYA   | ENYMRR-----              |                               | 422                          |              |     |
| TaAM     | THDNDTTLGWYRTATPHEKA     | FMARYLAD-----WGIT-----   | F                             | 425                          |              |     |
| AtDPE1   | THDNDTIRGWWDTLDQEEKS     | KAMKYLSI-----            |                               | 486                          |              |     |
| D-enzyme | THDNDTIRGWWDTLTPQEEKS    | NVLKYLSN-----            |                               | 498                          |              |     |
| EcAM     | THDLPTLRGYWECGDLTLGKT    | LGLYPDEVVLRGLYQDRELAKQ   | GLLDALHKYGCLPKRA-             | 604                          |              |     |
| CgAM     | THDLPTAGYLEGEHIALRERL    | GVLNTDPAEEL-AEDLQ-WQAE   | ILDVAASANALPAREY              | 616                          |              |     |
|          | ***                      | .*:                      |                               |                              |              |     |
| SaAM     | L-----                   | PNEPITETVLR              | TLYATVSQTTITCMQDLLDKPADSRM    | NMPNTVG-GNWQWR               | 473          |     |
| TaAM     | R-----                   | EEEEVPWALMHLMG           | KSVARLAVYPVQDVLALGSEARMNYPGR  | PS-GNWAWR                    | 476          |     |
| AtDPE1   | A-----                   | GEDDISWSVIQA             | AFSSSTAQTAIIPMQDILGLGSSARMNT  | PATEV-GNWGWR                 | 537          |     |
| D-enzyme | I-----                   | EEEEISRGLIEG             | AVSSVARI                      | IIPMQDVLGLGSDSRMNI           | PATQF-GNWSWR | 549 |
| EcAM     | -GHKAS                   | LMSMTPTLN                | RGLQRYIAD--SNSALLGLQPEDWLDMAE | FPVNIPGTS-YQYKNWR            | 660          |     |
| CgAM     | VGLERD                   | QRGELAE                  | LEGLHTFAK--TPSALT             | CVCLVDMVGEKRAQNPQGTTRDMYPNWC | 674          |     |
|          | :                        | :                        | : : :                         | * *                          | *            |     |
| SaAM     | MRKEDLTENRK---           | AFLKEITTIYNRGNKLEHHHHHH  | -----                         | 507                          |              |     |
| TaAM     | LLPGELSPEH---            | GARLRAMAEATERL           | -----                         | 500                          |              |     |
| AtDPE1   | IPSSTSFDNLETES           | DRLRDLSLYGRL             | -----                         | 564                          |              |     |
| D-enzyme | IPSSTSFDNLD              | AEAKKL                   | RDILATYGRL                    | -----                        | 576          |     |
| EcAM     | RKLSATLES                | MFADDGVNKLKDLDRRRRS      | SAHHHHHH                      | -----                        | 696          |     |
| CgAM     | IPLCDSE-----             | GNSVLIES                 | RENELYHRVAKASKRDL             | LEHHHHHH                     | 714          |     |
|          | :                        | :                        |                               |                              |              |     |

**Figure S1. Sequence alignment of various AMs and disproportionation enzymes.** Yellow colours represent the catalytic triad residues. The N-terminal region is shown in green, while the dimerization arm is highlighted in cyan.

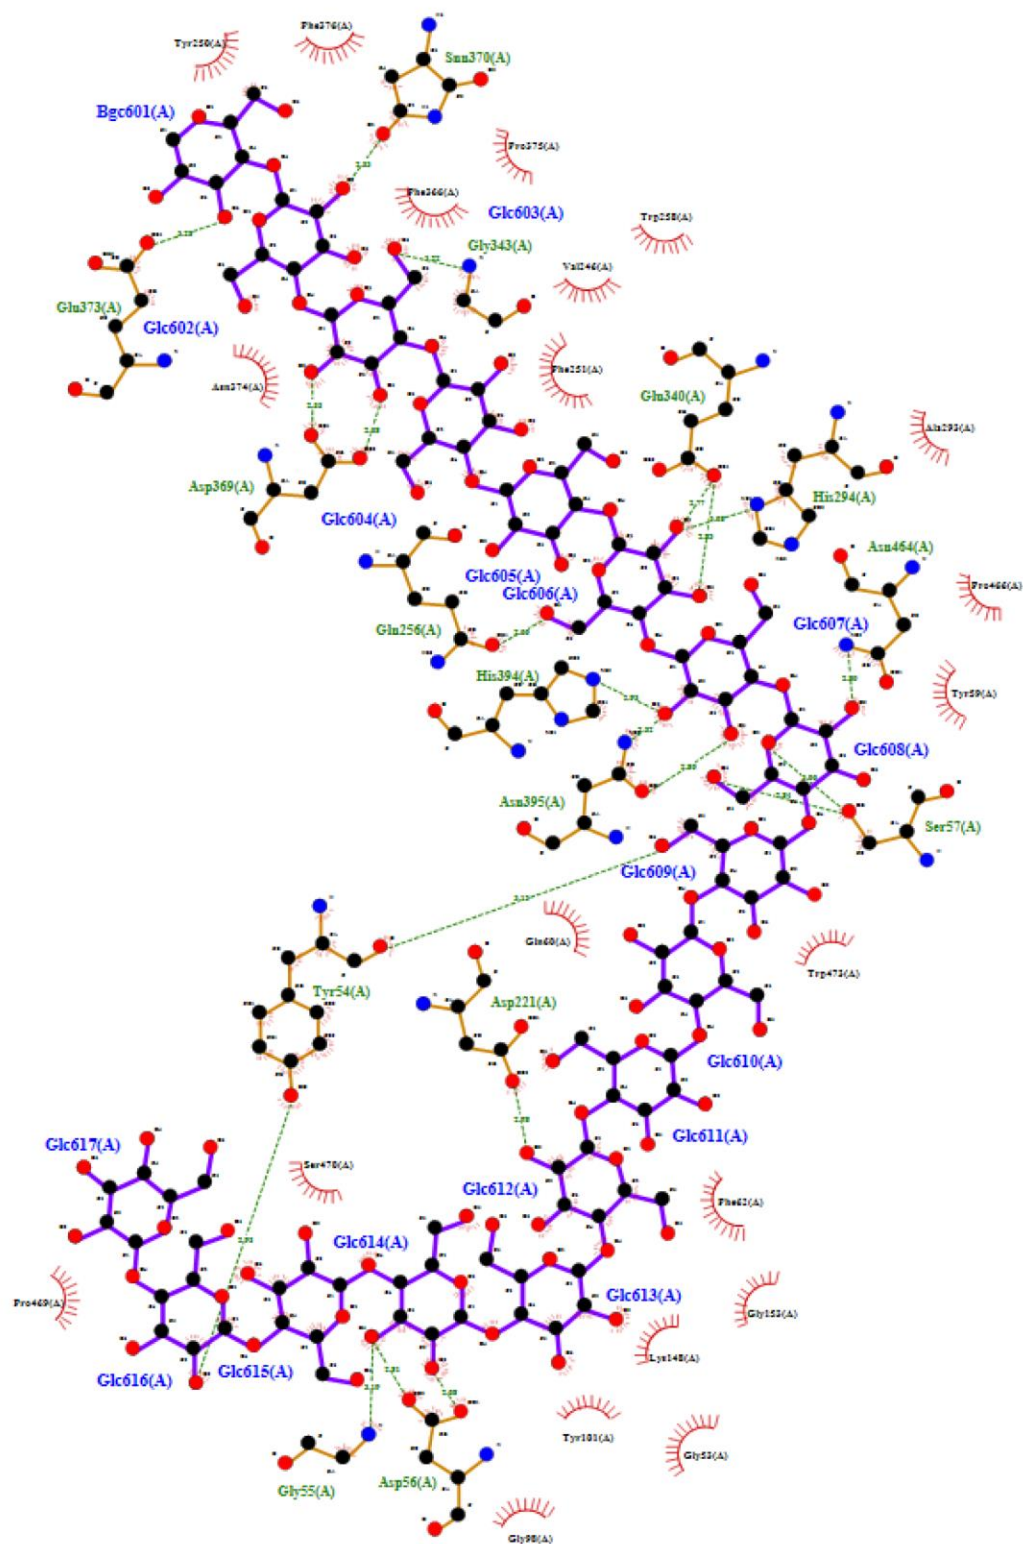

Figure S2. LigPlot of Interaction between *TaAM* and 17 mer glucan. The structure PDB: 5JIW is analyzed by LigPlot software.
